# Supplementary material for: Lymphocyte innateness defined by transcriptional states reflects a balance between proliferation and effector functions
Source: PubMed Central journal article supplement (PMC6368609; doi:10.1038/s41467-019-08604-4), 2019-02-08
Supplement: 41467_2019_8604_MOESM3_ESM.pdf [file 41467_2019_8604_MOESM3_ESM.pdf]

## **Description of Additional Supplementary Files**

File Name: Supplementary Data 1

Description: T cell subset abundances and clinical information of 101 individuals.

File Name: Supplementary Data 2

Description: RNA-seq QC metrics per sample.

File Name: Supplementary Data 3

Description: Results of gene expression associations with innateness gradient in low input RNA-seq.

File Name: Supplementary Data 4

Description: Antibody information.
